# Supplementary material for: Prediction accuracy improvement for landslide susceptibility mapping using the combination of frequency ratio, Analytical Hierarchy Process, and curve fitting methods in the area between Sinop and Ayancık, Türkiy
Source: PeerJ journal article supplement (doi:10.7717/peerj-cs.3538), 2026-02-03
Supplement: Dataset1.xlsx [file Dataset1.xlsx]

## Sheet: Page
	Class	Count in the variable class	Count in the landslide test area	Curve fit optimizer (Results)		Eaquation	Min	Max	Normalize
Litology							105.643	75002.4
Sinop Fm.	1	37194	2821	105.643		f(x)= -39546.94973473 * x1^4 + 22929.02564922 * log(x2) + -132294.64599809 * x1 + -69355.59680745			0
Akveren Fm.	2	100474	5571	22891.4					0.304229
Alüvyon Fm.	3	109930	0	24953.7					0.331765
Ayancık Üyesi	4	111271	88755	25231.8					0.335477
Kusuri Fm.	5	975165	83387	75002.4					1
Atbaşı Fm.	6	322293	29765	49616.6					0.661056
Sarıkum Fm.	7	81985	5731	18228.5					0.241971
Total count		1738312	216030
Slope						f(x)= -424.07389652 * x1^4 + -13578.72896886 * log(x2) + 41935.74596167 * x1 + 168961.6346291	-1447.47	76990.9
0-7	1	396728	23494	35429.8					0.470144
7 14	2	762792	88542	62127.6					0.81051
14-21	3	735629	61604	76990.9					1
21-45	4	839811	42189	42915.2					0.565573
45<	5	4780	187	-1447.47					0
Total count		2739740	216016						0.0184536
Aspect						f(x)= -2.48744677e-06 * x1^4 + 36432.6831 * log(x2) + 48.5778109 * x1 + -437928.316	6016.44	48064.5
N	90	553463	48038	48064.5					1
NE	45	335055	28381	27745.9					0.516777
E	0	283212	17887	19445.8					0.319382
SE	315	252091	9402	6016.44					0
S	270	280857	12244	19038.3					0.30969
SE	225	325449	27658	29065.3					0.548155
W	180	311829	35308	29085.6					0.548638
NW	135	397784	37098	37554.3					0.750043
Total count		2341956	216016						-0.143085
Curvature						f(x)= -4875.20577885 * x1^4 + -171607.47018209 * log(x2) + 8350.78402946 * x1 + 2436245.84838737	55662	80530
<-0,2	1	938199	79824	79824					0.97161
-0,2-0,2	2	740471	55662	55662					0
0,2<	3	106107	80530	80530					1
Total count		1784777	216016
Land cover						f(x)= -549.443093 * x1^4 + -96434.3212 * log(x2) + 128785.121 * x1 + 1022858.46	5989.36	76160.2
Heavy Forest	5	584757	40525	42835.4					0.525091
Moderate Forest	4	891199	84711	76160.2					1
Light Forest	3	713755	55087	64938.7					0.840084
Agriculture	2	407189	29285	25992.3					0.285061
Settlement	1	143552	6308	5989.36					0
Total count		2740452	215916
Proximity to the road						f(x)= 9.64386460e+01 * x1^4 + 4.00939949e+04 * log(x2) + -1.35507850e+04 * x1 +-4.39484440e+05	-6536.63	122017
0-300	1	1689926	142185	122017					1
300-600	2	625904	44415	70089.6					0.596065
600-900	3	232488	9614	23100					0.230539
900-1200	4	102177	8626	-6536.63					0
1200-1500	5	59636	7476	-6090.05					0.00347388
1500-1800	6	27945	3366	14677.4					0.165021
1800<	7	1844	279	-1296.24					0.0407643
Total count		2739920	215961
Proximity to the fault						f(x)= 338.726235 * x1^4 + -26147.7303 * log(x2) + -78592.8425 * x1 + 554745.833	7368.51	115698
0-500	1	982925	119556	115698					1
500-1000	2	694457	41294	51269.6					0.405256
1500-2000	3	404432	17494	8830.69					0.0134975
2000-2500	4	204320	4536	7368.51					0
2500-3000	5	453786	33188	32901.4					0.235697
Total count		2739920	216068
Elevation						f(x)= 1238.00664743 * x1^4 + 26422.09278013 * log(x2) + -111205.54426548 * x1 + -82157.80430929	-4.82352e-07	125091
0-300	1	163689	125091	125091					1
300-500	2	820173	75036	75036					0.599851
500-700	3	279837	15889	15889					0.12702
700-900	4	2835	0	-4.82352e-07					0
Total count		1102845	90925
Proximiy to the river						f(x)= 53.065988 * x1^4 + -8141.37134 * log(x2) + -49080.1951 * x1 + 271120.108	-17381.1	123299
0-500	1	186252	131935	123299					1
500-1000	2	758613	66922	63580.7					0.575505
1000-1500	3	99529	15940	34485.3					0.368684
1500-2000	4	11972	1271	11934.1					0.208382
2000-2500	5	4805	0	-10132.4					0.051526
2500-3000	6	2237	0	-17381.1					0
3000-3500	7	242	0	10282.7					0.196644
Total count		1063650	216068

## Sheet: Accuracy 
Frekans		study area	landslide area	Suscept.index
Very low	1	237878	10421	3.72463
Low	2	541209	40396	14.4382
Medium	3	779869	79998	28.5926
High	4	755956	93671	33.4795
Very high	5	420383	55300	19.7651
Total		2735295	279786
				81.8372	Başarı oranı
