# Supplementary material for: Prediction accuracy improvement for landslide susceptibility mapping using the combination of frequency ratio, Analytical Hierarchy Process, and curve fitting methods in the area between Sinop and Ayancık, Türkiy
Source: PeerJ journal article supplement (doi:10.7717/peerj-cs.3538), 2026-02-03
Supplement: Table_for_CF.xlsx [file Table_for_CF.xlsx]

## Sheet: Sayfa4
FREQUENCY RATIO METHOD							AHP METHOD							CURVE FITTING
SUSCEPTIBILITY INDEX		LANDSLIDE TEST GROUP		LANDSLIDE CONTROL GROUP			SUSCEPTIBILITY INDEX		LANDSLIDE TEST GROUP		LANDSLIDE CONTROL GROUP			SUSCEPTIBILITY INDEX		LANDSLIDE TEST GROUP		LANDSLIDE CONTROL GROUP
VALUE	COUNT	VALUE	COUNT	VALUE	COUNT		VALUE	COUNT	VALUE	COUNT	VALUE	COUNT		VALUE	COUNT	VALUE	COUNT	VALUE	COUNT
1	104	2	5	1	2		1	785	3	4	3	36		1	4	7	2	6	9
2	580	3	19	2	6		2	548	4	21	4	10		2	8	10	1	16	7
3	955	4	325	3	42		3	2080	5	55	5	29		3	7	13	3	17	3
4	5778	5	475	4	294		4	2622	6	147	6	51		4	6	14	3	19	19
5	6895	6	1233	5	381		5	4556	7	194	7	82		5	2	15	3	20	9
6	17292	7	1449	6	1559		6	7064	8	127	8	193		6	83	16	2	21	28
7	20240	8	2217	7	1568		7	9219	9	623	9	117		7	25	18	15	23	16
8	25465	9	2198	8	2287		8	9729	10	678	10	297		8	73	19	8	24	30
9	26756	10	2077	9	2460		9	11039	11	1232	11	600		9	113	20	16	25	7
10	31642	11	2288	10	2695		10	16580	12	1223	12	442		10	117	21	26	26	49
11	27848	12	1985	11	2524		11	19528	13	1321	13	484		11	113	22	3	27	122
12	28660	13	3326	12	2590		12	10926	14	1735	14	989		12	200	23	24	28	119
13	39037	14	1484	13	3463		13	16319	15	1328	15	1245		13	308	24	17	29	260
14	20273	15	2302	14	1625		14	23531	16	1418	16	1361		14	243	25	17	30	213
15	24429	16	1081	15	1983		15	29629	17	2595	17	1999		15	257	26	46	31	199
16	10602	17	1243	16	816		16	26383	18	2118	18	1433		16	707	27	104	32	589
17	7013	18	1318	17	455		17	37442	19	1595	19	1852		17	604	28	108	33	329
18	6621	19	610	18	324		18	27249	20	2178	20	2301		18	835	29	116	34	487
19	1843	20	519	19	58		19	28088	21	3266	21	3054		19	1401	30	267	35	674
20	1304	21	94	20	81		20	37702	22	4439	22	3280		20	1222	31	126	36	541
21	264	22	40	21	32		21	48108	23	3149	23	3636		21	1796	32	300	37	722
22	103	25	6	22	9		22	55046	24	3013	24	3900		22	1268	33	186	38	876
23	502	26	168	24	19		23	50442	25	4575	25	3598		23	2630	34	670	39	660
24	2264	27	375	25	108		24	45040	26	3747	26	2919		24	3085	35	515	40	859
25	4003	28	660	26	399		25	54585	27	3884	27	4168		25	2648	36	480	41	2052
26	7178	29	1552	27	1333		26	41908	28	3068	28	3229		26	3448	37	509	42	1799
27	18968	30	1943	28	1475		27	55165	29	4457	29	4546		27	5254	38	852	43	1139
28	21979	31	2363	29	3355		28	45092	30	4013	30	2766		28	4652	39	556	44	1803
29	47800	32	2938	30	3157		29	63237	31	3008	31	2678		29	8325	40	678	45	2287
30	44677	33	3200	31	3846		30	42358	32	2579	32	3031		30	9104	41	1351	46	1966
31	45000	34	3481	32	4014		31	41151	33	6596	33	6536		31	8814	42	1445	47	2089
32	53095	35	5238	33	4551		32	41468	34	5426	34	5272		32	11061	43	1231	48	3557
33	53094	36	4305	34	4470		33	77018	35	5069	35	5185		33	9381	44	1450	49	3296
34	54473	37	5786	35	7096		34	68577	36	3007	36	2976		34	17905	45	1868	50	2492
35	82693	38	3064	36	5364		35	72652	37	3985	37	4487		35	10884	46	1059	51	4947
36	73264	39	4293	37	4279		36	40002	38	7648	38	5804		36	12663	47	1293	52	3314
37	65871	40	4826	38	3154		37	53510	39	5958	39	6099		37	17834	48	3343	53	2926
38	45261	41	5846	39	3546		38	68725	40	2257	40	3576		38	25461	49	2972	54	5383
39	46300	42	4844	40	3297		39	69057	41	3681	41	4270		39	15804	50	1921	55	4417
40	54308	43	6001	41	4410		40	42301	42	5566	42	6176		40	19224	51	4101	56	6356
41	70243	44	8399	42	3934		41	59032	43	4009	43	3958		41	40309	52	2735	57	4465
42	64604	45	5088	43	4626		42	71980	44	5406	44	5087		42	32689	53	2356	58	4749
43	66122	46	7437	44	8138		43	46808	45	3521	45	3647		43	25925	54	4780	59	5124
44	99973	47	4258	45	4710		44	68935	46	6958	46	6324		44	37363	55	3709	60	7499
45	56174	48	4197	46	6748		45	46979	47	3246	47	3839		45	44837	56	5439	61	6734
46	69175	49	3991	47	3635		46	71851	48	5518	48	5213		46	29490	57	3247	62	5244
47	35741	50	3196	48	3571		47	38514	49	4039	49	5790		47	36266	58	4180	63	5428
48	30961	51	1569	49	3388		48	73829	50	5214	50	5182		48	53742	59	5562	64	7451
49	30137	52	719	50	1756		49	57362	51	4345	51	5189		49	58705	60	6494	65	4800
50	20709	53	389	51	1026		50	57740	52	3087	52	3260		50	40183	61	6159	66	7626
51	14675	54	130	52	838		51	55409	53	4107	53	4706		51	63408	62	5424	67	5607
52	16147	55	521	53	661		52	38774	54	3173	54	2760		52	43260	63	5977	68	4704
53	13551	56	588	54	878		53	53359	55	3965	55	4534		53	49933	64	6321	69	7085
54	15377	57	983	55	1192		54	32365	56	2843	56	2156		54	73959	65	5708	70	4683
55	20865	58	1931	56	1365		55	46779	57	2506	57	2818		55	53299	66	8309	71	5212
56	19489	59	2356	57	1488		56	31697	58	4018	58	4340		56	81600	67	4603	72	6268
57	21600	60	1485	58	2685		57	30169	59	2382	59	2055		57	52355	68	5297	73	5757
58	32226	61	2278	59	2949		58	45591	60	2202	60	3200		58	55948	69	7792	74	4927
59	31635	62	2039	60	1499		59	25581	61	2268	61	2182		59	62122	70	5264	75	7047
60	19294	63	2550	61	2303		60	28896	62	3094	62	3403		60	91107	71	4736	76	5316
61	29207	64	2665	62	1747		61	27039	63	3011	63	2718		61	88224	72	5046	77	3851
62	21321	65	2578	63	4143		62	33857	64	1838	64	2316		62	58074	73	6752	78	4320
63	47143	66	5262	64	3075		63	29647	65	1771	65	1883		63	63129	74	4638	79	4538
64	43007	67	4077	65	3573		64	27107	66	1373	66	1643		64	91121	75	7885	80	3183
65	56179	68	4082	66	5186		65	19279	67	2751	67	2252		65	64372	76	5915	81	3100
66	91137	69	5219	67	4058		66	15429	68	1032	68	1408		66	85358	77	4748	82	2442
67	62996	70	4871	68	3917		67	23724	69	1521	69	1407		67	53375	78	4479	83	3181
68	64907	71	5188	69	4966		68	12195	70	1553	70	1853		68	62768	79	6054	84	2467
69	64056	72	7781	70	4218		69	14091	71	1807	71	1894		69	83078	80	3596	85	2396
70	57109	73	4491	71	5198		70	17138	72	1057	72	835		70	48983	81	3236	86	1229
71	55091	74	4928	72	6544		71	15703	73	1270	73	1722		71	54712	82	3324	87	1537
72	61126	75	2892	73	3176		72	9749	74	1330	74	1171		72	55455	83	3720	88	1425
73	31401	76	2496	74	3617		73	12761	75	579	75	558		73	71864	84	3186	89	789
74	30412	77	2330	75	2059		74	10734	76	1112	76	987		74	48447	85	3727	90	1450
75	13686	78	487	76	1141		75	6386	77	703	77	814		75	66934	86	1728	91	915
76	10073	79	302	77	864		76	8207	78	716	78	581		76	58412	87	1702	92	646
77	7403	80	47	78	129		77	8014	79	598	79	560		77	36537	88	2242	93	864
78	1377	85	200	79	15		78	7280	80	517	80	546		78	44005	89	1239	94	978
79	797	86	352	81	1		79	5912	81	540	81	651		79	53012	90	1536	95	393
80	241	87	147	82	72		80	5160	82	342	82	471		80	31609	91	1444	96	518
81	160	88	624	83	178		81	6446	83	420	83	597		81	30115	92	927	97	794
82	1511	89	919	84	467		82	4747	84	470	84	573		82	27912	93	1541	98	260
83	2077	90	1098	85	1046		83	4070	85	444	85	426		83	34982	94	2031	99	490
84	6363	91	1241	86	1309		84	5345	86	382	86	409		84	32302	95	341	100	299
85	10125	92	1321	87	772		85	3493	87	289	87	180		85	27579	96	848
86	25054	93	1862	88	1530		86	4359	88	308	88	518		86	18433	97	856
87	16868	94	1735	89	1062		87	2268	89	250	89	173		87	15639	98	357
88	27411	95	1736	90	1082		88	3830	90	225	90	196		88	18586	99	480
89	19270	96	899	91	1252		89	1834	91	121	91	124		89	9886	100	404
90	17623	97	1566	92	1663		90	2465	92	170	92	252		90	15874
91	17321	98	672	93	1627		91	1464	93	73	93	72		91	10291
92	18935	99	432	94	1300		92	2042	94	142	94	181		92	6421
93	13380	100	67	95	1187		93	800	95	113	95	240		93	10825
94	11963			96	711		94	1779	97	1	96	26		94	10450
95	10038			97	834		95	1449	98	63	97	2		95	3360
96	5545			98	330		96	134	99	38	98	40		96	5694
97	6245			99	147		97	88	100	48	99	29		97	5600
98	1920			100	3		98	518			100	58		98	1751
99	1345						99	380						99	3272
100	279						100	261						100	2785
